1 **Fitness effects of CTX-M-15-encoding IncF plasmids on their native**  
2 ***Escherichia coli* ST131 H30Rx hosts**

3 Jana Palkovicova<sup>1,2</sup>, Iva Kutilova<sup>1</sup>, Javier DelaFuente<sup>3</sup>, Adam Valcek<sup>1,4,5</sup>, Matej Medvecky<sup>1,6</sup>,  
4 Ivana Jamborova<sup>1</sup>, Ibrahim Bitar<sup>7</sup>, Minh Duy Phan<sup>8</sup>, Alvaro San Millan<sup>9</sup>, Monika  
5 Dolejska<sup>1,2,7,10\*</sup>

6 <sup>1</sup>*Central European Institute of Technology, University of Veterinary Sciences Brno, Brno, Czech*  
7 *Republic*

8 <sup>2</sup>*Department of Biology and Wildlife Diseases, University of Veterinary Sciences Brno, Brno, Czech*  
9 *Republic*

10 <sup>3</sup>*Department of Microbiology, Hospital Universitario Ramon y Cajal (IRYCIS), Madrid, Spain*

11 <sup>4</sup>*Microbial Resistance and Drug Discovery, VIB-VUB Center for Structural Biology, VIB, Flanders*  
12 *Institute for Biotechnology, Brussels, Belgium*

13 <sup>5</sup>*Structural Biology Brussels, Vrije Universiteit Brussel (VUB), Brussels, Belgium*

14 <sup>6</sup>*Institute of Biodiversity, Animal Health and Comparative Medicine, University of Glasgow, Glasgow,*  
15 *United Kingdom*

16 <sup>7</sup>*Biomedical Center, Faculty of Medicine in Pilsen, Charles University, Pilsen, Czech Republic*

17 <sup>8</sup>*Australian Infectious Diseases Research Centre, School of Chemistry and Molecular Biosciences, The*  
18 *University of Queensland, Brisbane, Australia*

19 <sup>9</sup>*Centro Nacional de Biotecnología-CSIC, Madrid, Spain*

20 <sup>10</sup>*Department of Clinical Microbiology and Immunology, Institute of Laboratory Medicine, The*  
21 *University Hospital Brno, Czech Republic*

22

23 \*Corresponding author. Tel: +420 541 562 643 ; E-mail: [monika.dolejska@gmail.com](mailto:monika.dolejska@gmail.com)

24

25 Running title: Fitness effects of IncF plasmids on *E. coli* ST131 H30Rx

## 26 **Abstract**

### 27 **Objectives**

28 The objective of this study was to investigate effects of large CTX-M-15-encoding IncF  
29 plasmids on the fitness of their native *E. coli* ST131 *H30Rx* hosts in order to understand  
30 possible plasmid-host coevolution.

### 31 **Methods**

32 We selected five *E. coli* ST131 *H30Rx* strains of diverse origin, each carrying a multireplicon  
33 IncF plasmid encoding the gene *bla*<sub>CTX-M-15</sub>. The plasmid was eliminated from each isolate by  
34 displacement using an incompatible plasmid vector pMDP5\_cureEC958. Whole-genome  
35 sequencing (WGS) was performed to obtain complete chromosome and plasmid sequences of  
36 wild-type isolates and to detect chromosomal mutations in plasmid-free strains. Competition  
37 assays were conducted to determine the relative fitness of plasmid-free clones compared to the  
38 corresponding wild-type isolates.

### 39 **Results**

40 We were able to successfully eliminate the IncF plasmids from all of the wild-type strains using  
41 the curing vector pMDP5\_cureEC958. The chromosomes of plasmid-free clones contained zero  
42 to six point mutations. Plasmid-free strains of three isolates showed no significant difference in  
43 relative fitness compared to the corresponding plasmid-free strains. In the two remaining  
44 isolates, the plasmids produced a small but significant fitness cost.

### 45 **Conclusion**

46 We conclude that IncF plasmids produce moderate fitness effects in their *E. coli* ST131 *H30Rx*  
47 hosts. This fitness compatibility is likely to promote the maintenance of antibiotic resistance in  
48 this worrisome *E. coli* lineage.

## 49 **Introduction**

50 Extraintestinal pathogenic *E. coli* (ExPEC) represent a huge public health burden<sup>1</sup> as these  
51 strains are a common source of numerous diseases, from mild to life-threatening infections,  
52 such as urinary tract or blood-stream associated infections, bacteraemia and meningitis<sup>2</sup>.  
53 Globally emerging multi-drug resistance, especially to antimicrobials of clinical importance,  
54 such as fluoroquinolones and cephalosporins, is of special concern in this species in recent  
55 years. Due to the resistance, only a few or even no therapeutic options are left for a treatment  
56 of infections caused by these bacteria<sup>2,3</sup>.

57 Resistance to clinically important antimicrobials among ExPEC strains was scarce before 2000.  
58 Since then, the number of ExPEC isolates resistant to fluoroquinolones and cephalosporins has  
59 been increasing exponentially<sup>4</sup>. Highly virulent and multi-drug resistant *E. coli* ST131 is one  
60 of the clinically most important ExPEC strains due to its worldwide predominance. Even though  
61 *E. coli* ST131 was mainly associated with human infections<sup>5</sup>, recent findings brought a  
62 disturbing evidence of its dissemination among companion animals, poultry, livestock, food  
63 products, wildlife and environment, including wastewater treatment plant effluents<sup>6,7</sup>.

64 A study from 2015<sup>8</sup> analysed the evolution of *E. coli* ST131 lineage. Based on investigations  
65 from the mid-2000s, it is apparent that previous consumption and misuse of antimicrobials is  
66 linked with the emergence of resistant pathogens<sup>8,9</sup>. Antimicrobials, such as fluoroquinolones  
67 and cephalosporins, were often used for the treatment of human infections which resulted in the  
68 emergence of fluoroquinolone resistant subclone *E. coli* ST131 *H30R*. Furthermore, by  
69 acquisition of an incompatibility F (IncF) plasmid carrying an ESBL gene *bla*<sub>CTX-M-15</sub>, a distinct  
70 fluoroquinolone resistant extended-spectrum beta-lactamase (ESBL) producing *E. coli* ST131  
71 subclone *H30Rx* emerged<sup>9,10</sup>. Compensatory mutations in combination with virulence  
72 determinants and resistance to clinically important antimicrobials allowed the subclone *H30Rx*

73 to outcompete other sublineages of *E. coli* ST131 and in the late 2000s became a globally  
74 disseminated and most prevalent ExPEC subclone<sup>8,11</sup>.

75 IncF are complex epidemic resistance plasmids composed of more than one plasmid replicon.  
76 CTX-M-15-encoding IncF plasmids present in the subclone *H30Rx* usually harbour two  
77 plasmid replicons with plasmid multilocus sequence type (pMLST) F2:A1:B-. These plasmids  
78 typically harbour other resistance genes apart from *bla*<sub>CTX-M-15</sub>, such as *bla*<sub>TEM-1</sub>, *bla*<sub>OXA-1</sub>,  
79 *aac(6')-Ib-cr*, *catB4*, *aadA5*, *mph(A)*, *dfrA7*, *tet(A)* and *sulI*. Additionally, the narrow-host  
80 IncF plasmids encode partitioning and addiction systems to ensure their maintenance<sup>6,8,12</sup>.  
81 Carriage of such large plasmids providing selective advantage for a bacterial host via additional  
82 virulence and antibiotic determinants, usually imposes a fitness cost to its host<sup>13</sup>. On the other  
83 hand, a previous study suggested that *E. coli* ST131 *H30Rx* is adapted to large IncF plasmids<sup>8</sup>.

84 In this study, we analyse plasmid-host interactions between this intriguing *E. coli* subclone and  
85 its plasmids. We aimed to estimate the fitness impact of the large F2:A1:B- IncF plasmids,  
86 previously recognised as a foundation of *H30Rx* sublineage emergence, on its native host. Five  
87 representatives of the *E. coli* ST131 *H30Rx* were selected for elimination of IncF plasmid using  
88 the curing vector pMDP5\_cureEC958. Plasmid fitness effects were subsequently calculated  
89 using competition assays between the plasmid-carrying and plasmid-free isogenic clones.

## 90 **Materials and Methods**

### 91 **Bacterial strains**

92 Five *E. coli* ST131 *H30Rx* strains were selected out of the collection of 169 *E. coli* ST131  
93 isolates of diverse origin from several geographic regions<sup>6</sup>. Selected isolates were of human (n  
94 = 3), environmental (n = 1) and companion animal (n = 1) origin. Each strain carried a large  
95 IncF plasmid harbouring *bla*<sub>CTX-M-15</sub>. Additional information on isolates obtained during our  
96 previous study<sup>6</sup> is presented in Table S1.

97 Bacterial strains were routinely grown on Luria-Bertani agar (LBA; Sigma-Aldrich, Saint  
98 Louis, USA) supplemented with cefotaxime (2 mg/L) at 37 °C overnight if not specified  
99 otherwise. Competition assays were performed in Luria-Bertani broth (LBB; Becton Dickinson,  
100 MD, USA).

### 101 **Construction of curing vector**

102 The curing vector pMDP5\_cureEC958 was designed based on the pCURE2 plasmid<sup>14</sup>. The  
103 backbone vector pMDP5 was assembled from three vectors including pUC19 (ori and MCS,  
104 126-1480 nt), pKD3 (chloramphenicol resistant gene, 85-980 nt) and pCURE2 (*sacB* gene, 209-  
105 2076 nt). Subsequently, a curing fragment (containing RepFIIA, RepFIA, *ccdA*, *sok*, *pemI*, and  
106 *vagC*) was synthesised and cloned into pMDP5, creating the curing vector pMDP5\_cureEC958  
107 (Figure 1). All cloning and DNA synthesis steps were performed by Epoch Life Science (Texas,  
108 USA). The sequence of pMDP5\_cureEC958 was deposited to GenBank under accession  
109 number MZ723317.

### 110 **Plasmid curing**

111 Plasmid-free variants were created using a curing method described by Hale and colleagues<sup>14</sup>  
112 with the curing vector pMDP5\_cureEC958. The plasmid curing vector was introduced into the  
113 wild-type strains by electroporation (1.8 kV, 25  $\mu$ Far, 200  $\Omega$ ) using Gene Pulser Xcell™  
114 electroporation system (Bio-Rad Laboratories Inc., California, USA) as described before<sup>15</sup>.  
115 Cultures harbouring both, the wild-type plasmid and the designed construct, were selected on  
116 LBA supplemented chloramphenicol (30 mg/L) and the presence of *bla*<sub>CTX-M</sub> and *catA1* genes  
117 was verified by PCR<sup>16,17</sup>. Transformants were cultivated on LBA containing chloramphenicol  
118 (30 mg/L) in order to eliminate the IncF plasmid. After successful removal of the wild-type  
119 plasmid, verified by the same PCR, the pMDP5\_cureEC958 was eliminated on a non-selective  
120 LBA plates supplemented with 5% sucrose. Three to four plasmid-free clones of each isolate  
121 were selected.

122 Selected plasmid-free clones were sequenced on MiSeq platform (Illumina) as described below  
123 to investigate possible single nucleotide mutations (SNPs) on chromosomes. Subsequently, one  
124 plasmid-free clone of isolates without chromosomal mutations was selected to reintroduce the  
125 corresponding wild-type IncF plasmid as a control of experiment. Plasmid DNA was extracted  
126 from wild-type strains using Genopure Plasmid Midi Kit (Roche Diagnostics GmbH,  
127 Mannheim, Germany). Plasmids were reintroduced by electroporation and their presence was  
128 confirmed by PCR assays for gene *bla<sub>CTX-M</sub>* and for FII and multiplex (FIA, FIB, FIC) IncF  
129 replicons<sup>16,18</sup>.

### 130 **Whole-genome sequencing**

131 Wild-type isolates were subjected for short- and long-read sequencing. Additionally, plasmid-  
132 free strains and plasmid-free strains with reintroduced wild-type IncF plasmid were selected for  
133 short-read sequencing. Genomic DNA for short-read sequencing was extracted using  
134 NucleoSpin® Tissue kit (Macherey-Nagel, GmbH & Co. KG, Germany), library was prepared  
135 by Nextera® XT Library Preparation kit (Illumina, San Diego, CA, USA) and sequenced using  
136 2x250 bp paired-end sequencing on MiSeq (Illumina) platform. NucleoSpin® Microbial DNA  
137 kit (Macherey-Nagel) was used for the extraction of genomic DNA aimed for long-read  
138 sequencing. Libraries were constructed using SMRTbell Express Template Prep Kit 2.0 (Pacific  
139 Biosciences, PacBio, USA) followed by single molecule real-time (SMRT) sequencing on  
140 Sequel I Platform (PacBio).

### 141 **Data analysis**

142 Raw reads acquired by Illumina sequencing were trimmed using Trimmomatic v0.39<sup>19</sup> to  
143 remove adaptor residues and discard low quality read regions ( $Q \leq 20$ ). SPAdes v3.13.1<sup>20</sup> with  
144 the "--careful" configuration was used to obtain *de novo* assemblies. Center for Genomic  
145 Epidemiology tools (PlasmidFinder v2.1, pMLST v2.0, ResFinder v4.0) were used to verify the  
146 presence of plasmid replicons and genes intermediating antibiotic resistance

147 (<https://cge.cbs.dtu.dk/services/>). HGAP4 in SMRT Link v.6 (PacBio) was used to obtain  
148 polished long reads in fastq format. Hybrid assembly of trimmed short and long reads was  
149 performed using Unicycler v0.4.8<sup>21</sup> and corrected with Pilon v1.23<sup>22</sup> in order to reconstruct  
150 chromosome and plasmid sequences of wild-type isolates. Complete circular sequences of  
151 plasmids were manually annotated using Geneious v7.1.9 (Biomatters, Auckland, New  
152 Zealand) in compliance with annotation form of previous studies<sup>23</sup>.

### 153 **Comparative genomics**

154 Phylogenetic relatedness of wild-type isolates was estimated. Prokka v1.14.1<sup>24</sup> was used to  
155 predict open reading frames of isolates assemblies and their core genome was aligned using  
156 Roary v3.12.0<sup>25</sup>. Subsequently, the alignment was used to generate phylogenetic tree in  
157 RAxML v8.2.11<sup>26</sup> under GTR+GAMMA model supported by 1,000 bootstraps. A nucleotide  
158 similarity between the isolates was estimated using the core genome alignment in snp-dists  
159 v0.6.3 (<https://github.com/tseemann/snp-dists>) considering the number of SNPs. The  
160 phylogenetic tree was visualized in iTOL v5.7<sup>27</sup>.

161 BLAST (Basic Local Alignment Search Tool) of NCBI (National Center for Biotechnology  
162 Information, MD, USA) was used to find and download a plasmid sequence with the highest  
163 coverage and identity from GenBank. Genetic content of the IncF plasmids was compared using  
164 BLAST Ring Image Generator (BRIG) v0.95<sup>28</sup> and Clinker v0.0.13<sup>29</sup>. Presence and  
165 nomenclature of specific insertion sequences in IncF plasmids were confirmed using ISfinder  
166 database<sup>30</sup> and toxin-antitoxin systems were verified using Conserved Domain Database<sup>31</sup>.

167 Comparison of the wild-type isolates to the corresponding plasmid-free strains and to the  
168 plasmid-free strains with reintroduced plasmids was made to verify the identity of the strains  
169 as well as the identity of the wild-type and reintroduced plasmids. Corresponding sequences  
170 were aligned using algorithm BWA-MEM v0.7.17<sup>32</sup> and manually checked in Geneious v7.1.9.

## 171 **Single nucleotide polymorphism analysis**

172 Corrected short reads of plasmid-free variants were mapped to the corresponding wild-type *de*  
173 *novo* assemblies using Bowtie2 v2.3.5<sup>33</sup>. Variant calling was performed by VarScan v2.4.4<sup>34</sup>  
174 based on the coverage of mapped reads. Minimum variant frequency was 80% and called  
175 variants were manually checked in Geneious v7.1.9. Corresponding wild-type reads were  
176 mapped and analysed as well in order to normalize obtained results.

## 177 **Transferability of IncF plasmids**

178 Wild-type *E. coli* ST131 *H30Rx* isolates were used as donors while laboratory strain *E. coli*  
179 TOP10 (Invitrogen Life Technologies, Carlsbad, CA, USA) and corresponding plasmid-free  
180 variants of studied isolates were used as recipients for the estimation of conjugation ability of  
181 IncF plasmids using filter mating assays based on a previous study<sup>35</sup>. Conjugations were  
182 conducted in technical triplicates and biological duplicates.

## 183 **Relative fitness measurements**

184 Competition assays were performed to compare the relative fitness of the wild-type strains and  
185 their plasmid-free clones using flow cytometry as previously described<sup>36</sup>. Only the plasmid-  
186 free strains without chromosomal mutations were selected for fitness experiments. A small non-  
187 mobilisable pBGC plasmid (MT702881)<sup>37</sup> producing green fluorescent protein (GFP) was  
188 transformed to the wild-type strains by electroporation<sup>15</sup>. Transformants were selected on LBA  
189 plates containing cefotaxime (2 mg/L) and chloramphenicol (30 mg/L) and subsequently  
190 verified by PCR assays for genes *bla*<sub>CTX-M</sub> and *gfp*<sup>16,37</sup>.

191 Two competition assays, each consisting of six biological replicates, were performed for each  
192 isolate. Competitions were performed between GFP-tagged wild-type strains and their untagged  
193 plasmid-free variants while each included a competition between tagged and untagged wild-  
194 types for normalisation. Overnight cultures were mixed in ratio 1:1 and diluted 1:400 for the



195 competition. GFP expression in the wild-type strains resulting in fluorescence was induced by  
196 incubation in 0.9% sodium chloride solution containing 0.5% L-arabinose for 1.5 hours.  
197 Plasmid-free and wild-type populations were competed at 37 °C for 22 hours shaking at 225  
198 rpm. Initial and final proportions were measured on NovoCyte (ACEA Biosciences) flow  
199 cytometer recording 50,000 events of each mixture. Relative fitness of plasmid-free clones  
200 compared to corresponding wild-types was estimated using the formula:

$$w = \frac{\ln\left(\frac{N_{final,GFP-}}{N_{initial,GFP-}}\right)}{\ln\left(\frac{N_{final,GFP+}}{N_{initial,GFP+}}\right)}$$

202 where  $w$  represents relative fitness,  $N_{initial, GFP-}$  and  $N_{final, GFP-}$  are initial and final values of  
203 untagged population and  $N_{initial, GFP+}$  and  $N_{final, GFP+}$  are proportions of GFP-marked population  
204 before and after competition. Relative fitness of plasmid-free clones was statistically processed  
205 using Student's T-test where relative fitness with  $p$  value  $< 0.05$  was evaluated as statistically  
206 significant. Obtained data was normalized using a competition between the tagged and  
207 untagged wild-type populations in order to capture relative fitness of plasmid-free clones in  
208 comparison to the corresponding (untagged) wild-type isolates. Competitions between wild-  
209 type strains and constructed plasmid-free strains with reintroduced wild-type IncF plasmid were  
210 performed as a control.

## 211 **Results**

### 212 **Strain and plasmid features**

213 In order to compare fitness effects of the plasmid on its native host, *E. coli* ST131 H30Rx  
214 isolates carrying a single large *bla*<sub>CTX-M-15</sub> harbouring IncF plasmid were selected. The  
215 phylogenetic analysis of the five selected strains (Table S1) was based on the core-genome  
216 alignment of 4,803 genes and showed 78-440 SNPs differences (Figure S1).

217 All five plasmids contained two IncF replicons (RepFIA, RepFII) with pMLST formula  
218 F2:A1:B-, slightly varied in size and antibiotic resistance genes content (Figure S2). All  
219 plasmids provided multi-drug resistance profile, encoding genes for ESBL as well as for other  
220 antimicrobials and contained insertion sequences, mostly IS26 (Table 1). The *ccdAB* and *pemIK*  
221 toxin-antitoxin systems were encoded in all plasmids within replicons RepFIA and RepFII,  
222 respectively. Each plasmid harboured two copies of the addiction system *vapBC*. All but one  
223 plasmid (pM45) harboured *hok/sok* system and plasmids of human isolates encoded *parDE*  
224 system.

225 All IncF plasmids in our study have proved to be non-conjugative. Genetic analysis of transfer  
226 (*tra*) regions showed diverse defects in all plasmids likely resulting in their non-functionality  
227 (Figure 2). The *tra* region of pOV24 was disrupted in two parts by the *bla*<sub>TEM-1</sub> gene, usually  
228 transposed within a composite mobile genetic element, but 3' flanking sequence IS26 was  
229 disrupted by *ISEcpI* element. Furthermore, the *traC* gene was truncated by another IS26 and  
230 genes *traW* and *traU*, encoding proteins for pilus assembly and DNA transfer, were missing.  
231 The *tra* region of pM70 was disrupted by composite mobile element containing *bla*<sub>TEM-1</sub> gene  
232 flanked by IS15DI and IS26 similarly as in pOV24. Moreover, part of the second half of the *tra*  
233 genes was translocated 29.5 kb from the first part of the *tra* region and truncated by IS26 in  
234 *traN* gene. The first part of the *tra* region, including *traJ*, serving as a transcriptional activator  
235 of the *tra* region, was completely missing in plasmids pM24 and pM45. Plasmid pDog168  
236 lacked most of this part of the region as well with an exception of the *traM* gene.

### 237 **Plasmid curing**

238 To study plasmid-associated fitness effects on their native host, all five wild-type strains were  
239 cured of the naturally occurring IncF plasmids. A curing vector pMDP5\_cureEC958 was  
240 designed for the generation of plasmid-free variants, harbouring selective genes (*catA1* and

241 *sacB*), replicons RepFIA, RepFII, and antitoxins of the addiction systems encoded by wild-type  
242 plasmids (Figure 1).

243 Four plasmid-free clones per each of four isolates (M24, M45, M70 and Dog168) and all three  
244 grown plasmid-free clones of the isolate OV24 were selected for further analyses. Sequence  
245 comparison of plasmid-free clones to the corresponding wild-type isolates discovered zero to  
246 six chromosomal mutations. Mutations occurred in 52.6% of plasmid-free strains (in 10 out of  
247 19). Nearly all mutations (92%, 23/25) occurred in protein coding sequences, only two of them  
248 were located in intergenic regions. Additionally, most of the mutations in coding sequences  
249 (82.6%, 19/23) were non-synonymous. No mutations occurred only in one of the plasmid-free  
250 clones of the OV24 (1/3) and M70 (1/4) isolates, in two Dog168 (2/4), two M24 (2/4) and three  
251 M45 (3/4) plasmid-free clones. Detailed list of genetic changes in plasmid-free clones is in  
252 Table S2.

253 Four of all plasmid-free strains with the reintroduced wild-type plasmid (40%, 4/10) harboured  
254 one mutation. Although, only one of them was non-synonymous.

### 255 **Fitness impact of IncF plasmids on their native host**

256 To maintain isogenic conditions in the competition experiment, only the plasmid-free clones  
257 with no mutations in their chromosome were selected for the measurement of the IncF-  
258 associated fitness effects on their native host. Relative fitness of plasmid-free clones was  
259 estimated in comparison to the corresponding wild-type isolates considering a background  
260 fitness of wild-types as 1 (Table 2). Analysis of two competition assays both consisting of six  
261 biological replicates for each combination plasmid-free clone and wild-type revealed non-  
262 significant fitness effects ( $p > 0.05$ ) of IncF plasmids in three isolates (Dog168, OV24, M45).  
263 Moderate increase ( $p < 0.05$ ) of relative fitness was observed in plasmid-free strains of two  
264 isolates (M24 and M70) as visualised in Figure 3, revealing a small plasmid fitness cost.

265 Relative fitness differences of the two M24 plasmid-free clones were statistically significant  
266 (with  $p$ -value  $1.83 \times 10^{-6}$  and  $4.07 \times 10^{-4}$ , respectively), however, the increase in relative fitness  
267 was moderate (1.04 and 1.02). A similar result was observed for the M70 plasmid-free clone,  
268 which showed a moderate but significant increase in relative fitness compared to the wild type  
269 clone ( $w = 1.03$ ,  $p = 1.5 \times 10^{-3}$ ).

## 270 **Discussion**

271 Even though the *E. coli* ST131 has attracted much attention in the last few years due to its  
272 predominance in ExPEC infections, its success is still not fully elucidated. Plasmids play a key  
273 role in bacterial survival under a selection pressure by providing virulence and antibiotic  
274 resistance genes, but it is known that they often impose a fitness burden to their hosts<sup>38-40</sup>.  
275 However, the fitness cost of a specific plasmid can differ in various hosts<sup>41</sup>.

276 In our study, we investigated the fitness effects of strictly clade-specific<sup>12</sup> F2:A1:B- IncF  
277 plasmids, previously recognised as a source of *H30Rx* subclone emergence<sup>8,11</sup>, on these native  
278 hosts. Five native *E. coli* ST131 *H30Rx* hosts were cured of the large *bla*<sub>CTX-M-15</sub>-harbouring  
279 IncF plasmids and then competed against their corresponding wild-type strain to calculate the  
280 plasmid fitness impact.

## 281 **Plasmid curing**

282 Plasmid curing was previously recognised as a best way to study effects of a plasmid on a  
283 bacterial population<sup>38</sup>. Traditionally used methods for plasmid curing involved bacterial growth  
284 in the presence of a chemical factor<sup>42</sup>. Although these techniques were widely used, efficiency  
285 of plasmid curing was low and promoted high accumulation of unwanted mutations<sup>43</sup>. Recently,  
286 the CRISPR (Clustered Regularly Interspaced Short Palindromic Repeats) curing is being used  
287 more often. The CRISPR curing is based on targeting a specific conserved sequence within  
288 plasmids and subsequent plasmid cleavage. This technique is efficient and do not generate new

289 mutations, however, there are still plasmids which avoid targeting<sup>44</sup>. As IncF plasmids are  
290 known for their complexity and many combinations of the replicon alleles among the plasmids,  
291 the pCURE method<sup>14</sup> with the vector pMDP5\_cureEC958 was used in this study. The method  
292 is based on incompatibility of the targeted plasmid with an introduced curing vector. Even  
293 though many plasmids overcome incompatibility elimination, it is possible to design a construct  
294 with more replicons and antitoxin genes to successfully cure a strain of a plasmid. The approach  
295 proved efficient in the past<sup>14,44</sup> as well as in our study. On the other hand, we observed point  
296 mutation accumulation in 52.6% (10 out of 19) of the plasmid-free clones. Therefore, WGS  
297 after pCURE plasmid curing followed by genomic comparison of plasmid-free clones and their  
298 corresponding wild-type isolates is necessary to exclude the clones harbouring mutations and  
299 to obtain reliable relative fitness results.

### 300 **Fitness effects of the F2:A1:B- plasmids**

301 The fitness cost imposed by plasmids is influenced by several factors. It was observed before,  
302 that solely the size of plasmids plays no role in their fitness cost, however, maintaining the  
303 plasmid-encoded accessory genes can produce an energetic burden. The increasing number of  
304 accessory genes, such as antimicrobial resistance genes, correlates with the higher fitness cost<sup>45</sup>.

305 In order to evaluate the fitness impact of the F2:A1:B- plasmids providing their hosts with  
306 multi-drug resistance, we estimated relative fitness of the plasmid-free strains in comparison to  
307 the corresponding wild-type isolates. Competitions followed by measurement using flow  
308 cytometer were used for this purpose. This method is considered much more sensitive than  
309 growth curve analysis allowing to detect even subtle differences in relative fitness<sup>13</sup>. We  
310 demonstrated that fitness impact of these IncF plasmids on their native hosts in non-selective  
311 conditions was moderate to negligible in human as well as in animal and environmental isolates  
312 which is in concordance with previous studies on F2:A1:B- plasmids<sup>46-48</sup>. A study of Shin and  
313 Ko<sup>47</sup> focused on effects of CTX-M-14 and CTX-M-15 IncF plasmids from human clinical

314 isolates and their impact on a laboratory *E. coli* J53 strain. Based on the growth curve analysis  
315 of the transconjugants, the authors proposed that strains harbouring *bla*<sub>CTX-M</sub> on IncF plasmids  
316 were as competitive as the naive host. Ranjan and his colleagues<sup>48</sup> studied competitiveness of  
317 *E. coli* ST131 harbouring IncF plasmids and their plasmid-free variants against colicin-  
318 producing *E. coli* ST10. The authors observed similar fitness ( $p > 0.05$ ) of the wild-type *E. coli*  
319 ST131 and their plasmid-free variants based on growth curves analysis. However, growth  
320 curves in this experiment were conducted on selective plates which could affect the fitness of  
321 the strains as some antibiotic resistance genes are genetically linked to each other and co-  
322 selected. Therefore, the supplementation of plates with antibiotics could create a selection  
323 pressure where carriage of plasmids would be more beneficial for the strain survival<sup>49</sup>.  
324 Mah rault and colleagues<sup>46</sup> provided the investigation on two human clinical *bla*<sub>CTX-M-15</sub>-  
325 harbouring F2:A1:B- plasmids and their impact on an *E. coli* J53-2. Even though the fitness  
326 cost of an IncF plasmid occurred initially after conjugation, the authors observed that this fitness  
327 cost alleviated and a transconjugant carrying the IncF plasmid proved more competitive than a  
328 transconjugant harbouring an IncC plasmid.

329 Previous studies also indicated that a functional conjugation system could have a negative  
330 impact on a bacterial fitness and plasmids use several different ways to suppress the conjugative  
331 transfer<sup>39</sup>. Even though the silencing of the conjugative transfer results in a decrease of  
332 horizontal spread of the plasmids, the vertical spread is supported by a fitness cost reduction<sup>50</sup>.  
333 The *tra* region responsible for conjugative transfer investigated during our study was  
334 incomplete, the missing genes and length of the missing sequences differed among studied  
335 plasmids. The rearrangements resulted in the non-functionality of the *tra* region of each  
336 plasmid. Conjugation malfunction together with plasmid addiction systems ensure the vertical  
337 transmission of the IncF plasmids. Additionally, it was pointed out that the initial fitness cost  
338 is reduced over time. This phenomenon was observed in long-term evolution experiments, even

339 though the fitness of the plasmid-bearing strains was lower than of those without plasmids in  
340 many cases<sup>39</sup>.

341 We demonstrated that fitness impact of these IncF plasmids on their native hosts in non-  
342 selective conditions was moderate to negligible among phylogenetically unrelated isolates of  
343 diverse origin. Our results, combined with previous findings, strongly suggest that *E. coli*  
344 *H30Rx* and IncF plasmids form successful associations promoting the world-wide  
345 dissemination of this ExPEC lineage.

### 346 **Acknowledgements**

347 We thank Jarka Lausova and Dana Cervinkova from University of Veterinary Sciences Brno  
348 (Czech Republic) and Aida Alonso del Valle and Carmen de la Vega from Hospital  
349 Universitario Ramon y Cajal (Spain) for their work in the laboratory. Furthermore, we are  
350 grateful to Kristina Nesporova from University of Veterinary Sciences Brno and Jaroslav  
351 Hrabak from the University Hospital Pilsen (Czech Republic) for the help with short- and long-  
352 read sequencing, respectively. We also thank Chris Thomas for the inspiration and help in  
353 designing the curing plasmid.

### 354 **Funding**

355 This work was supported by the Czech Science Foundation (18-23532S), Ministry of Health of  
356 the Czech Republic (NU20J-05-00033) and by CEITEC 2020 - Central European Institute of  
357 Technology (LQ1601) from the Czech Ministry of Education, Youth and Sports within the  
358 National Programme for Sustainability II. Jana Palkovicova was supported by Internal Grant  
359 Agency of University of Veterinary Sciences Brno (grants 214/2020/FVHE and  
360 215/2020/FVHE).

### 361 **Transparency declarations**

362 None to declare.

363 **References**

- 364 1. World Health Organization. *Antimicrobial Resistance: Global Report on Surveillance*.  
365 Geneva, Switzerland; 2014.
- 366 2. Schwaber MJ, Navon-Venezia S, Kaye KS, Ben-Ami R, Schwartz D, Carmeli Y. Clinical  
367 and Economic Impact of Bacteremia with Extended-Spectrum- $\beta$ -Lactamase-Producing  
368 *Enterobacteriaceae*. *Antimicrob Agents Chemother* 2006; **50**: 1257–62.
- 369 3. Mathers AJ, Peirano G, Pitout JDD. *Escherichia coli* ST131: The Quintessential Example of  
370 an International Multiresistant High-Risk Clone. In: *Advances in Applied Microbiology*. Vol  
371 90. Elsevier Ltd, 2015; 109–54.
- 372 4. Pitout JDD. Extraintestinal pathogenic *Escherichia coli*: an update on antimicrobial  
373 resistance, laboratory diagnosis and treatment. *Expert Rev Anti Infect Ther* 2012; **10**: 1165–76.
- 374 5. Poolman JT, Wacker M. Extraintestinal Pathogenic *Escherichia coli*, a Common Human  
375 Pathogen: Challenges for Vaccine Development and Progress in the Field. *J Infect Dis* 2016;  
376 **213**: 6–13.
- 377 6. Jamborova I, Johnston BD, Papousek I, *et al*. Extensive Genetic Commonality among  
378 Wildlife, Wastewater, Community, and Nosocomial Isolates of *Escherichia coli* Sequence Type  
379 131 (*H30R1* and *H30Rx* Subclones) That Carry *bla*<sub>CTX-M-27</sub> or *bla*<sub>CTX-M-15</sub>. *Antimicrob Agents*  
380 *Chemother* 2018; **62**: e00519-18.
- 381 7. Kidsley AK, White RT, Beatson SA, *et al*. Companion Animals Are Spillover Hosts of the  
382 Multidrug-Resistant Human Extraintestinal *Escherichia coli* Pandemic Clones ST131 and  
383 ST1193. *Front Microbiol* 2020; **11**: 1968.
- 384 8. Mathers AJ, Peirano G, Pitout JDD. The role of epidemic resistance plasmids and  
385 international high- risk clones in the spread of multidrug-resistant *Enterobacteriaceae*. *Clin*  
386 *Microbiol Rev* 2015; **28**: 565–91.



- 387 9. Ben Zakour NL, Alsheikh-Hussain AS, Ashcroft MM, *et al.* Sequential acquisition of  
388 virulence and fluoroquinolone resistance has shaped the evolution of *Escherichia coli* ST131.  
389 *mBio* 2016; **7**: e00347-16.
- 390 10. Riley LW. Pandemic lineages of extraintestinal pathogenic *Escherichia coli*. *Clin Microbiol*  
391 *Infect* 2014; **20**: 380–90.
- 392 11. Price LB, Johnson JR, Aziz M, *et al.* The epidemic of Extended-Spectrum- $\beta$ -Lactamase-  
393 Producing *Escherichia coli* ST131 Is Driven by a Single Highly Pathogenic Subclone, H30-Rx.  
394 *mBio* 2013; **4**: e00377-13.
- 395 12. Kondratyeva K, Salmon-Divon M, Navon-Venezia S. Meta-analysis of Pandemic  
396 *Escherichia coli* ST131 Plasmidome Proves Restricted Plasmid-clade Associations. *Sci Rep*  
397 2020; **10**: 36.
- 398 13. San Millan A. Evolution of Plasmid-Mediated Antibiotic Resistance in the Clinical Context.  
399 *Trends Microbiol* 2018; **26**: 978–85.
- 400 14. Hale L, Lazos O, Haines AS, Thomas CM. An efficient stress-free strategy to displace stable  
401 bacterial plasmids. *Biotechniques* 2010; **48**: 223–8.
- 402 15. Wu N, Matand K, Kebede B, Acquah G, Williams S. Enhancing DNA  
403 electrotransformation efficiency in *Escherichia coli* DH10B electrocompetent cells. *Electron J*  
404 *Biotechnol* 2010; **13**.
- 405 16. Lewis II JS, Herrera M, Wickes B, Patterson JE, Jorgensen JH. First report of the Emergence  
406 of CTX-M-type Extended-Spectrum  $\beta$ -Lactamases (ESBLs) as the Predominant ESBL Isolated  
407 in a U.S. Health Care System. *Antimicrob Agents Chemother* 2007; **51**: 4015–21.
- 408 17. Faldynova M, Pravcova M, Sisak F, *et al.* Evolution of Antibiotic Resistance in *Salmonella*  
409 *enterica* Serovar Typhimurium Strains Isolated in the Czech Republic between 1984 and 2002.  
410 *Antimicrob Agents Chemother* 2003; **47**: 2002–5.

- 411 18. Carattoli A. Resistance plasmid families in *Enterobacteriaceae*. *Antimicrob Agents*  
412 *Chemother* 2009; **53**: 2227–38.
- 413 19. Bolger AM, Lohse M, Usadel B. Trimmomatic: A flexible trimmer for Illumina sequence  
414 data. *Bioinformatics* 2014; **30**: 2114–20.
- 415 20. Bankevich A, Nurk S, Antipov D, *et al.* SPAdes: A new genome assembly algorithm and  
416 its applications to single-cell sequencing. *J Comput Biol* 2012; **19**: 455–77.
- 417 21. Wick RR, Judd LM, Gorrie CL, Holt KE. Unicycler: Resolving bacterial genome assemblies  
418 from short and long sequencing reads. *PLoS Comput Biol* 2017; **13**: e1005595.
- 419 22. Walker BJ, Abeel T, Shea T, *et al.* Pilon: An integrated Tool for Comprehensive Microbial  
420 Variant Detection and Genome Assembly Improvement. *PLoS One* 2014; **9**: e112963.
- 421 23. Papagiannitsis CC, Kutilova I, Medvecky M, Hrabak J, Dolejska M. Characterization of the  
422 Complete Nucleotide Sequences of IncA/C2 Plasmids Carrying In809-Like Integrons from  
423 *Enterobacteriaceae* Isolates of Wildlife Origin. *Antimicrob Agents Chemother* 2017; **61**:  
424 e01093-17.
- 425 24. Seemann T. Prokka: rapid prokaryotic genome annotation. *Bioinformatics* 2014; **30**: 2068–  
426 9.
- 427 25. Page AJ, Cummins CA, Hunt M, *et al.* Roary: rapid large-scale prokaryote pan genome  
428 analysis. *Bioinformatics* 2015; **31**: 3691–3.
- 429 26. Stamatakis A. RAxML version 8: a tool for phylogenetic analysis and post-analysis of large  
430 phylogenies. *Bioinformatics* 2014; **30**: 1312–3.
- 431 27. Letunic I, Bork P. Interactive Tree of Life (iTOL) v4: Recent updates and new  
432 developments. *Nucleic Acids Res* 2019; **47**: 256–9.
- 433 28. Alikhan NF, Petty NK, Ben Zakour NL, Beatson SA. BLAST Ring Image Generator

- 434 (BRIG): Simple prokaryote genome comparisons. *BMC Genomics* 2011; **12**: 402.
- 435 29. Gilchrist CLM, Chooi Y-H. clinker & clustermap.js: automatic generation of gene cluster  
436 comparison figures. *Bioinformatics* 2021: btab007.
- 437 30. Siguier P, Perochon J, Lestrade L, Mahillon J, Chandler M. ISfinder: the reference centre  
438 for bacterial insertion sequences. *Nucleic Acids Res* 2006; **34**: D32–6.
- 439 31. Marchler-Bauer A, Derbyshire MK, Gonzales NR, *et al.* CDD: NCBI’s conserved domain  
440 database. *Nucleic Acids Res* 2015; **43**: D222–6.
- 441 32. Li H. Aligning sequence reads, clone sequences and assembly contigs with BWA-MEM.  
442 2013: 1–3.
- 443 33. Langmead B, Trapnell C, Pop M, Salzberg SL. Ultrafast and memory-efficient alignment  
444 of short DNA sequences to the human genome. *Genome Biol* 2009; **10**: R25.
- 445 34. Koboldt DC, Chen K, Wylie T, *et al.* VarScan: variant detection in massively parallel  
446 sequencing of individual and pooled samples. *Bioinformatics* 2009; **25**: 2283–5.
- 447 35. Top E, Vanrolleghem P, Mergeay M, Verstraete W. Determination of the Mechanism of  
448 Retrotransfer by Mechanistic Mathematical Modeling. *J Bacteriol* 1992; **174**: 5953–60.
- 449 36. DelaFuente J, Rodriguez-Beltran J, San Millan A. Methods to Study Fitness and  
450 Compensatory Adaptation in Plasmid-Carrying Bacteria. In: *Horizontal Gene Transfer.*  
451 *Methods in Molecular Biology*. Vol 2075. New York: Humana, 2020; 371–82.
- 452 37. Alonso-del Valle A, León-Sampedro R, Rodríguez-Beltrán J, *et al.* Variability of plasmid  
453 fitness effects contributes to plasmid persistence in bacterial communities. *Nat Commun* 2021;  
454 **12**.
- 455 38. San Millan A, Maclean RC. Fitness Costs of Plasmids: a Limit to Plasmid Transmission.  
456 *Microbiol Spectr* 2017; **5**: MTBP-0016-2017.

- 457 39. Porse A, Schönning K, Munck C, Sommer MOA. Survival and Evolution of a Large  
458 Multidrug Resistance Plasmid in New Clinical Bacterial Hosts. *Mol Biol Evol* 2016; **33**: 2860–  
459 73.
- 460 40. San Millan A, Peña-Miller R, Toll-Riera M, *et al.* Positive selection and compensatory  
461 adaptation interact to stabilize non-transmissible plasmids. *Nat Commun* 2014; **5**: 5208.
- 462 41. Johnson TJ, Singer RS, Isaacson RE, *et al.* *In Vivo* Transmission of an IncA/C Plasmid in  
463 *Escherichia coli* Depends on Tetracycline Concentration, and Acquisition of the Plasmid  
464 Results in a Variable Cost of Fitness. *Appl Environ Microbiol* 2015; **81**: 3561–70.
- 465 42. Zaman M, Pasha M, Akhter M. Plasmid Curing of *Escherichia coli* Cells with Ethidium  
466 Bromide, Sodium Dodecyl Sulfate and Acridine Orange. *Bangladesh J Microbiol* 2010; **27**:  
467 28–31.
- 468 43. Lauritsen I, Porse A, Sommer MOA, Nørholm MHH. A versatile one-step CRISPR-Cas9  
469 based approach to plasmid-curing. *Microb Cell Fact* 2017; **16**: 135.
- 470 44. Li Y, Lin Z, Huang C, *et al.* Metabolic engineering of *Escherichia coli* using CRISPR-Cas9  
471 mediated genome editing. *Metab Eng* 2015; **31**: 13–21.
- 472 45. Vogwill T, Maclean RC. The genetic basis of the fitness costs of antimicrobial resistance:  
473 a meta-analysis approach. *Evol Appl* 2015; **8**: 284–95.
- 474 46. Mahéroult A-C, Kemble H, Magnan M, *et al.* Advantage of the F2:A1:B- IncF Pandemic  
475 Plasmid over IncC Plasmids in *In Vitro* Acquisition and Evolution of *bla*<sub>CTX-M</sub> Gene-Bearing  
476 Plasmids in *Escherichia coli*. *Antimicrob Agents Chemother* 2019; **63**: e01130-19.
- 477 47. Shin J, Ko KS. Effect of plasmids harbouring *bla*<sub>CTX-M</sub> on the virulence and fitness of  
478 *Escherichia coli* ST131 isolates. *Int J Antimicrob Agents* 2015; **46**: 214–8.
- 479 48. Ranjan A, Scholz J, Semmler T, *et al.* ESBL-plasmid carriage in *E. coli* enhances in vitro

480 bacterial competition fitness and serum resistance in some strains of pandemic sequence types  
481 without overall fitness cost. *Gut Pathog* 2018; **10**: 24.

482 49. Andersson DI, Hughes D. Antibiotic resistance and its cost: Is it possible to reverse  
483 resistance? *Nat Rev Microbiol* 2010; **8**: 260–71.

484 50. Fernandez-Lopez R, del Campo I, Revilla C, Cuevas A, de la Cruz F. Negative Feedback  
485 and Transcriptional Overshooting in a Regulatory Network for Horizontal Gene Transfer. *PLoS*  
486 *Genet* 2014; **10**: e1004171.

487

488 **Figure 1** Genetic map of a plasmid vector pMDP5\_cureEC958 designed for plasmid curing. It  
489 contains chloramphenicol resistance encoding gene *catA1* for selective cultivation of strains  
490 harbouring the vector and sucrose sensitivity gene *sacB* for selection of plasmid-free isolates  
491 disposed of the vector. For the purpose of plasmid curing, it harbours genes encoding antitoxins  
492 VapB, PemI, Sok and CcdA and IncF plasmid replicons RepFIA and RepFII.

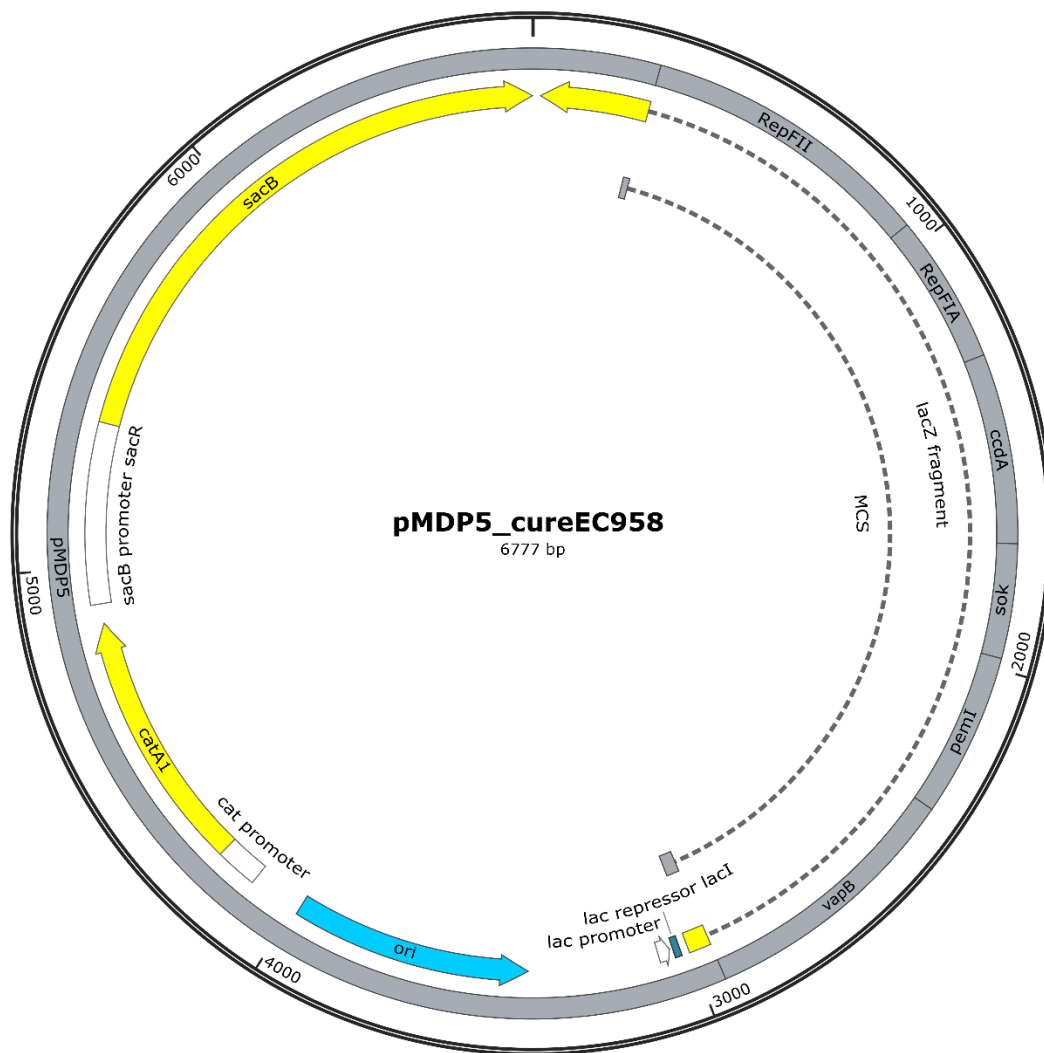

493

494

495

496 **Figure 2** Transfer region of studied plasmids. The shading shows the similarity above 99.9%.

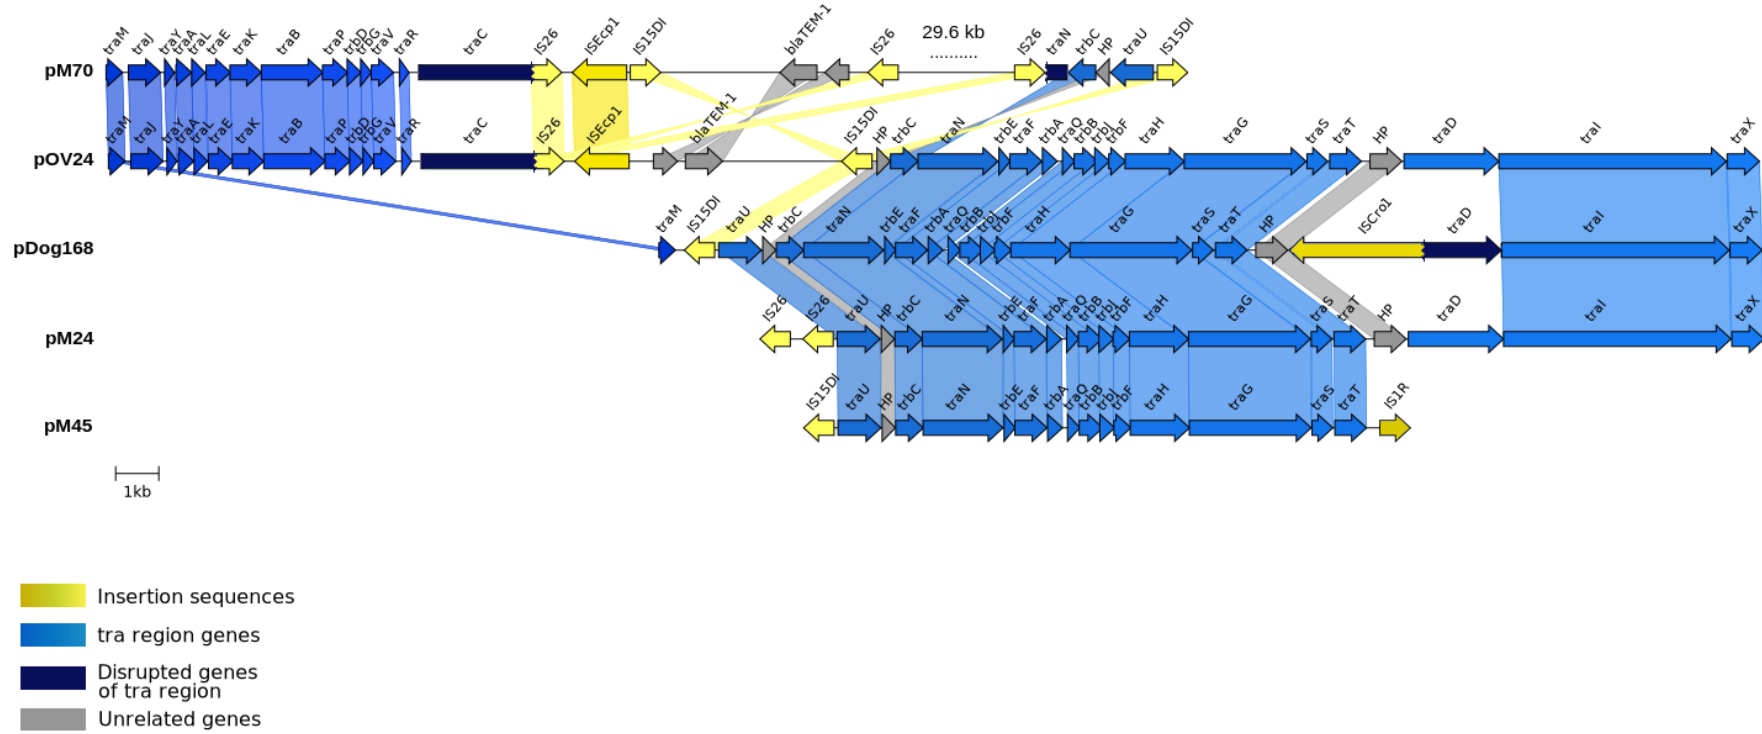

497

498

499 **Figure 3** Relative fitness of plasmid-free clones in comparison to the corresponding wild-type isolates. Background fitness of wild-types was estimated  
500 as 1. CC stands for cured clone. Bars indicate standard deviation.

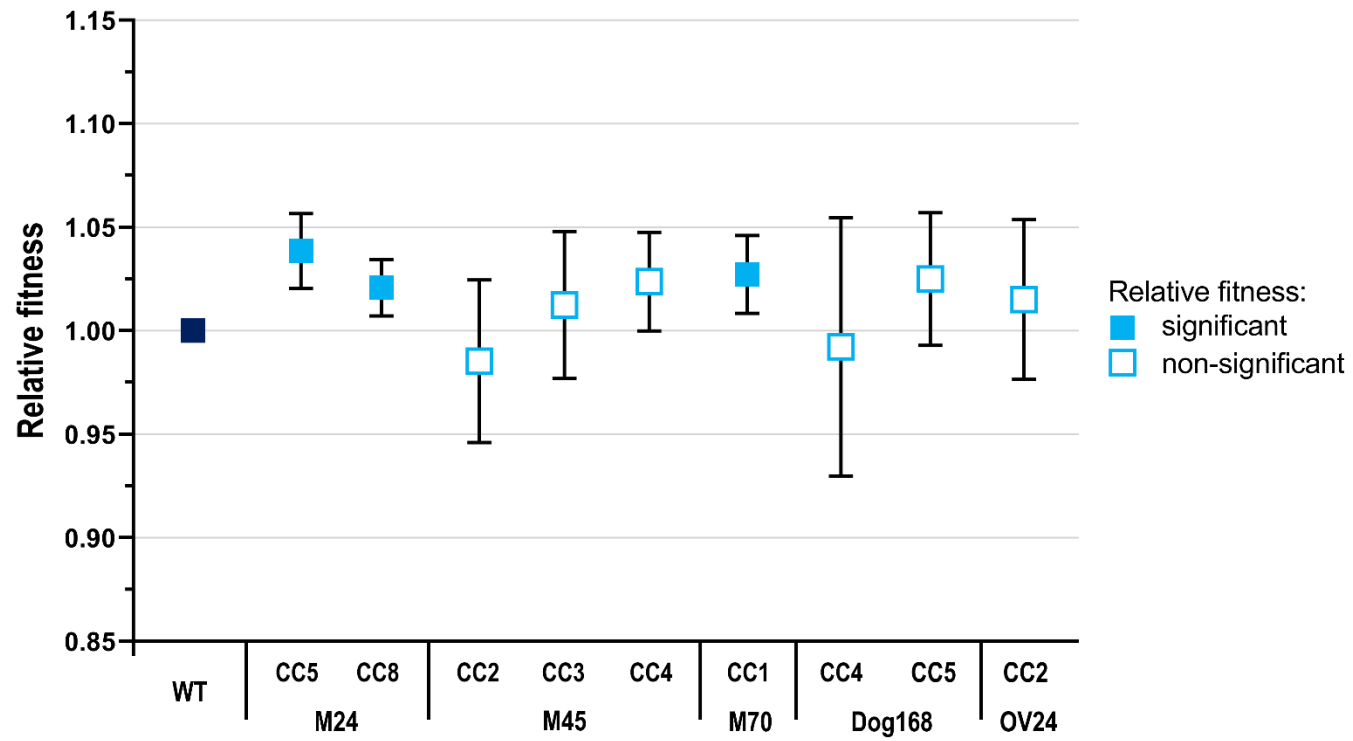

501



502 **Table 1** Selected genetic characteristics of CTX-M-15-encoding IncF plasmids in our study.

| Plasmid ID | pMLST <sup>a</sup> | Size (bp) | Toxin-antitoxins systems |              |              |              |                | ARGs <sup>b</sup>              |                             |                             |                      |             |              |               |               |               | GenBank accession number |              |
|------------|--------------------|-----------|--------------------------|--------------|--------------|--------------|----------------|--------------------------------|-----------------------------|-----------------------------|----------------------|-------------|--------------|---------------|---------------|---------------|--------------------------|--------------|
|            |                    |           | <i>ccdAB</i>             | <i>pemIK</i> | <i>vapCB</i> | <i>parED</i> | <i>hok/sok</i> | <i>bla</i> <sub>CTX-M-15</sub> | <i>bla</i> <sub>TEM-1</sub> | <i>bla</i> <sub>OXA-1</sub> | <i>aac(6')-Ib-cr</i> | <i>sul1</i> | <i>aadA5</i> | <i>mph(A)</i> | <i>dfpA17</i> | <i>tet(A)</i> |                          | <i>catB3</i> |
| pDog168    | F2:A1:B-           | 131,080   | ■                        | ■            | ■            |              | ■              |                                |                             | ■                           | ■                    | ■           | ■            | ■             | ■             | ■             | *                        | MZ634324     |
| pOV24      | F2:A1:B-           | 144,582   | ■                        | ■            | ■            |              | ■              | ■                              |                             | ■                           | ■                    | ■           | ■            | ■             | ■             | ■             | *                        | MZ634325     |
| pM45       | F2:A1:B-           | 106,909   | ■                        | ■            | ■            | ■            |                |                                |                             | ■                           | ■                    | ■           | ■            | ■             | ■             | ■             | *                        | MZ634322     |
| pM24       | F2:A1:B-           | 116,543   | ■                        | ■            | ■            | ■            | ■              |                                |                             | ■                           | ■                    | ■           | ■            | ■             |               |               | *                        | MZ634326     |
| pM70       | F2:A1:B-           | 126,514   | ■                        | ■            | ■            | ■            | ■              | ■                              |                             |                             |                      | ■           | ■            | ■             | ■             | ■             |                          | MZ634323     |

503 <sup>a</sup>pMLST – plasmid multilocus sequence type, <sup>b</sup>ARGs – antibiotic resistance genes

504 Coloured squares represent the presence of the genes, for antibiotic resistance genes with coverage 95% and identity 100%. \*Gene *catB3* was disrupted

505 by IS26 leaving 70.3% coverage resulting in gene malfunction.

506 **Table 2** Relative fitness of the plasmid-free clones in comparison to their wild-type isolates

| Isolate ID | Plasmid-free clone ID <sup>a</sup> | Relative fitness <sup>b</sup> ( $\pm$ SD) | <i>p</i> value               |
|------------|------------------------------------|-------------------------------------------|------------------------------|
| Dog168     | CC4                                | 0.992 $\pm$ 0.06                          | 0.764                        |
|            | CC5                                | 1.025 $\pm$ 0.03                          | 0.216                        |
| OV24       | CC2                                | 1.015 $\pm$ 0.04                          | 0.284                        |
| M45        | CC2                                | 0.985 $\pm$ 0.04                          | 0.386                        |
|            | CC3                                | 1.012 $\pm$ 0.03                          | 0.444                        |
|            | CC4                                | 1.024 $\pm$ 0.03                          | 0.108                        |
| <b>M24</b> | <b>CC5</b>                         | <b>1.038 <math>\pm</math> 0.02</b>        | <b>1.8 x 10<sup>-6</sup></b> |
|            | <b>CC8</b>                         | <b>1.021 <math>\pm</math> 0.01</b>        | <b>4 x 10<sup>-4</sup></b>   |
| <b>M70</b> | <b>CC1</b>                         | <b>1.027 <math>\pm</math> 0.02</b>        | <b>1.5 x 10<sup>-3</sup></b> |

507 <sup>a</sup> ID of constructed plasmid-free strains; CC stands for cured clone, <sup>b</sup> Relative fitness of plasmid-  
508 free strain compared to the corresponding wild-type isolate which background fitness was  
509 estimated as 1. Isolates highlighted in bold showed significant ( $p < 0.05$ ) relative fitness  
510 changes, however, the increase was moderate.
